# Supplementary material
Source: publisher figshare collection journal article supplement (https://gsajournals.figshare.com/articles/dataset/_/11573229)
Supplement: Supplementary file 2 [file 1]

**A**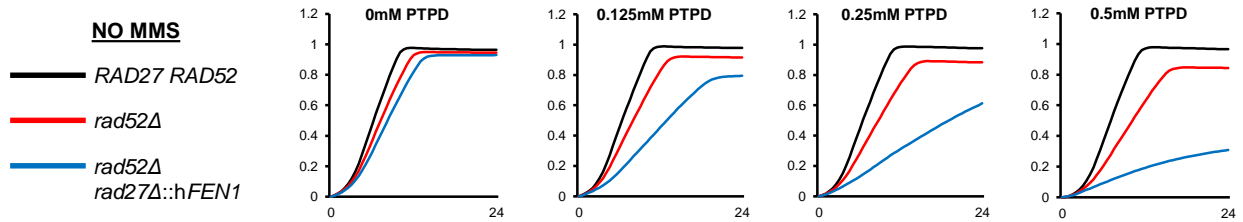**B**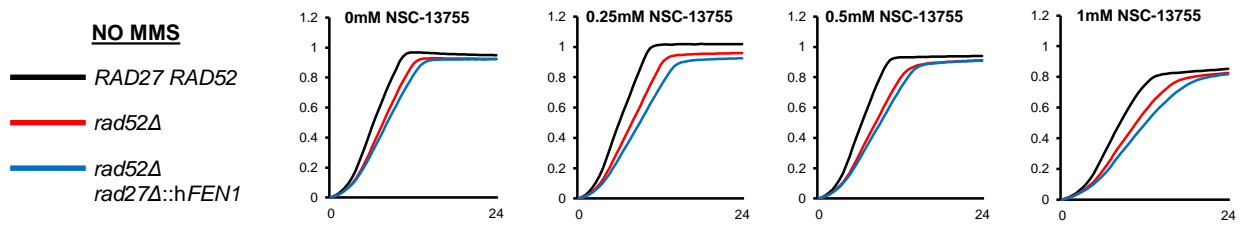

**Figure S4. Growth curve complementation assays to test hFEN1 inhibitors in HR-deficient yeast.**

All strains in this figure are in a *pdr1Δ pdr3Δ* background. “No MMS” refers to SC media. Yeast strains were grown in media + inhibitor at the indicated concentrations (or a 0.5% DMSO control) and each represented curve is the average of 3 replicates per media condition. For each panel, x-axis represents time in hours, while y-axis represents OD600 readings. The control strains (*RAD27 RAD52*) presented for each assay are the same as in Figure S3 since the experiments were performed in the same plate. Quantification of strain fitness is shown in Figure 5. Inhibitors tested in these assays include **(A)** PTPD. **(B)** NSC-13755.
