# Supplementary material
Source: publisher figshare collection journal article supplement (https://gsajournals.figshare.com/articles/dataset/_/11573229)
Supplement: Supplementary file 3 [file 1]

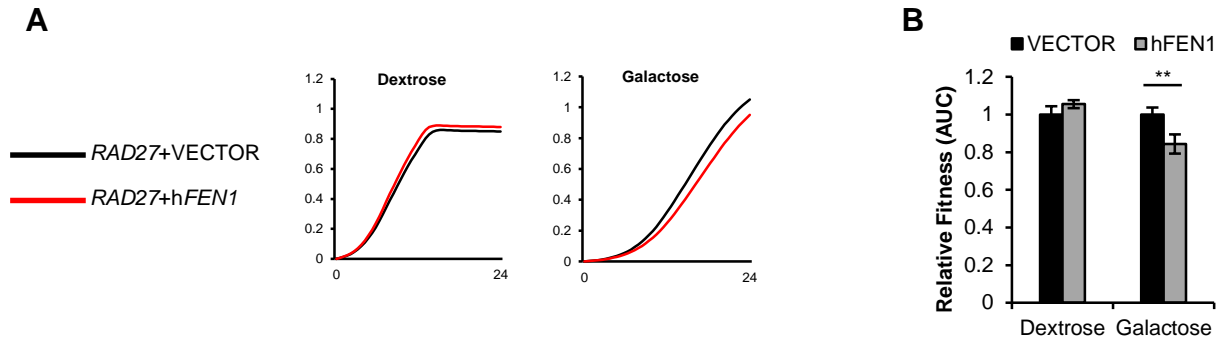

**Figure S5. Overexpression of hFEN1 in wild-type yeast cells causes minor fitness defects.**

**(A)** Wild-type yeast strains (BY4742) containing a vector control or hFEN1 cloned in a galactose-inducible yeast expression vector were grown in dextrose or galactose media. Each represented curve is the average of 4 replicates per media condition. For each panel, x-axis represents time in hours, while y-axis represents OD600 readings. **(B)** Quantification of strain fitness. Fitness of each strain was quantified by calculating area under the curve (AUC) of each replicate independently. Strain fitness was defined as the AUC of each yeast strain relative to the AUC of the wild-type strain containing the vector control and grown in the same media condition (mean  $\pm$  SD). Student's t-test. \*\* $p < 0.01$ .
