# Supplementary material
Source: publisher figshare collection journal article supplement (https://gsajournals.figshare.com/articles/dataset/_/11573229)
Supplement: Supplementary file 4 [file 1]

**A**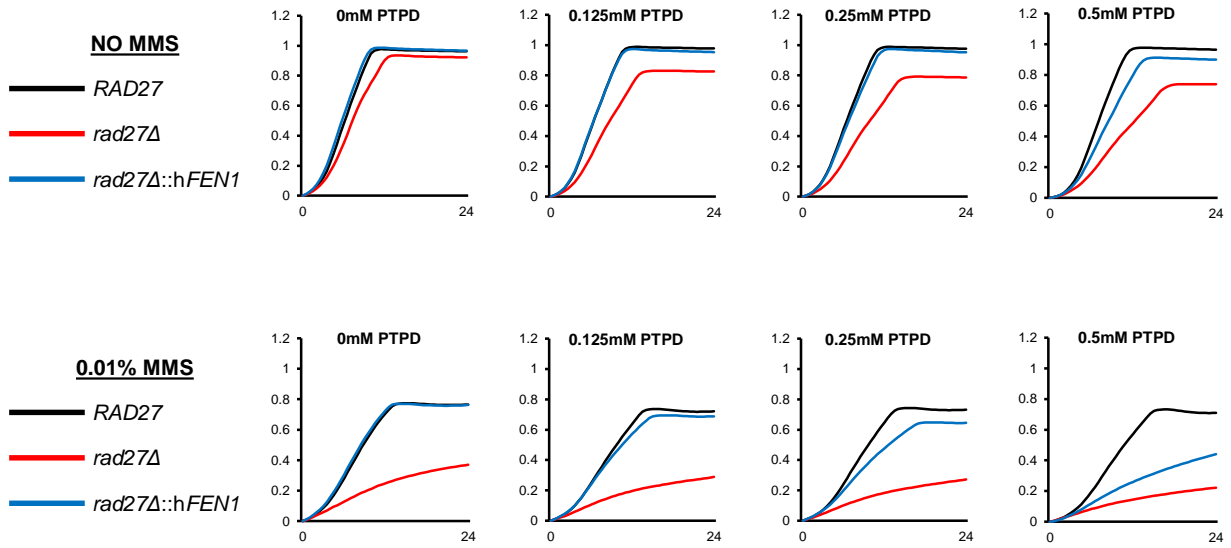**B**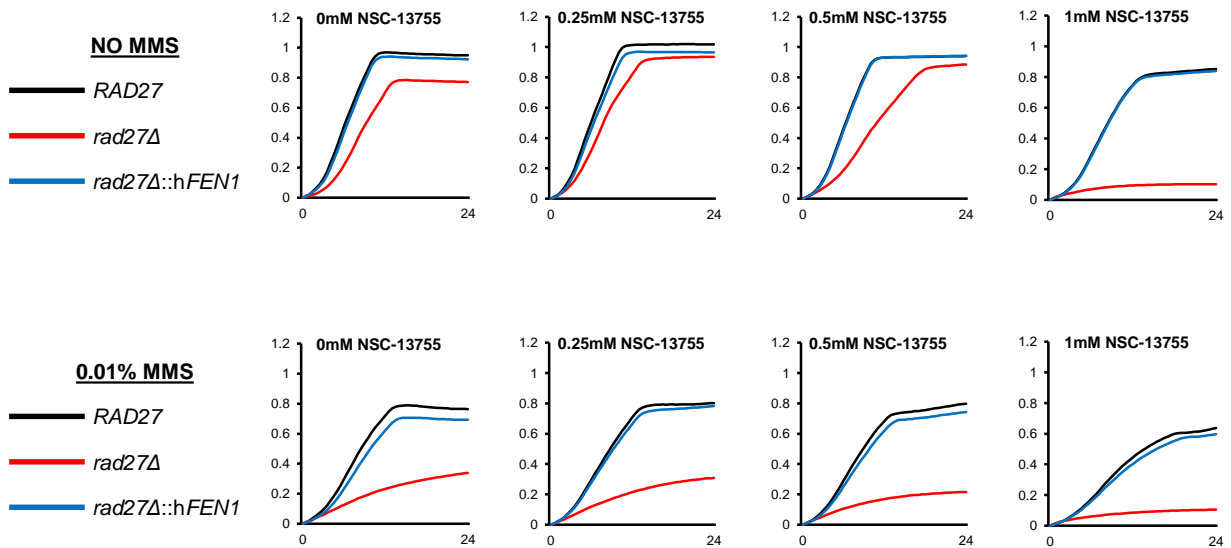

**Figure S3. Growth curve complementation assays to test hFEN1 inhibitors in MMS media.**

All strains in this figure are in a *pdr1Δ pdr3Δ* background. “No MMS” refers to SC media. “MMS” refers to SC + 0.01% MMS media. Yeast strains were grown in media + inhibitor at the indicated concentrations (or a 0.5% DMSO control) and each represented curve is the average of 3 replicates per media condition. For each panel, x-axis represents time in hours, while y-axis represents OD600 readings. Quantification of strain fitness is shown in Figure 4. Inhibitors tested in these assays include (A) PTPD. (B) NSC-13755.
