# Supplementary material
Source: publisher figshare collection journal article supplement (https://gsajournals.figshare.com/articles/dataset/_/11573229)
Supplement: Supplementary file 5 [file 1]

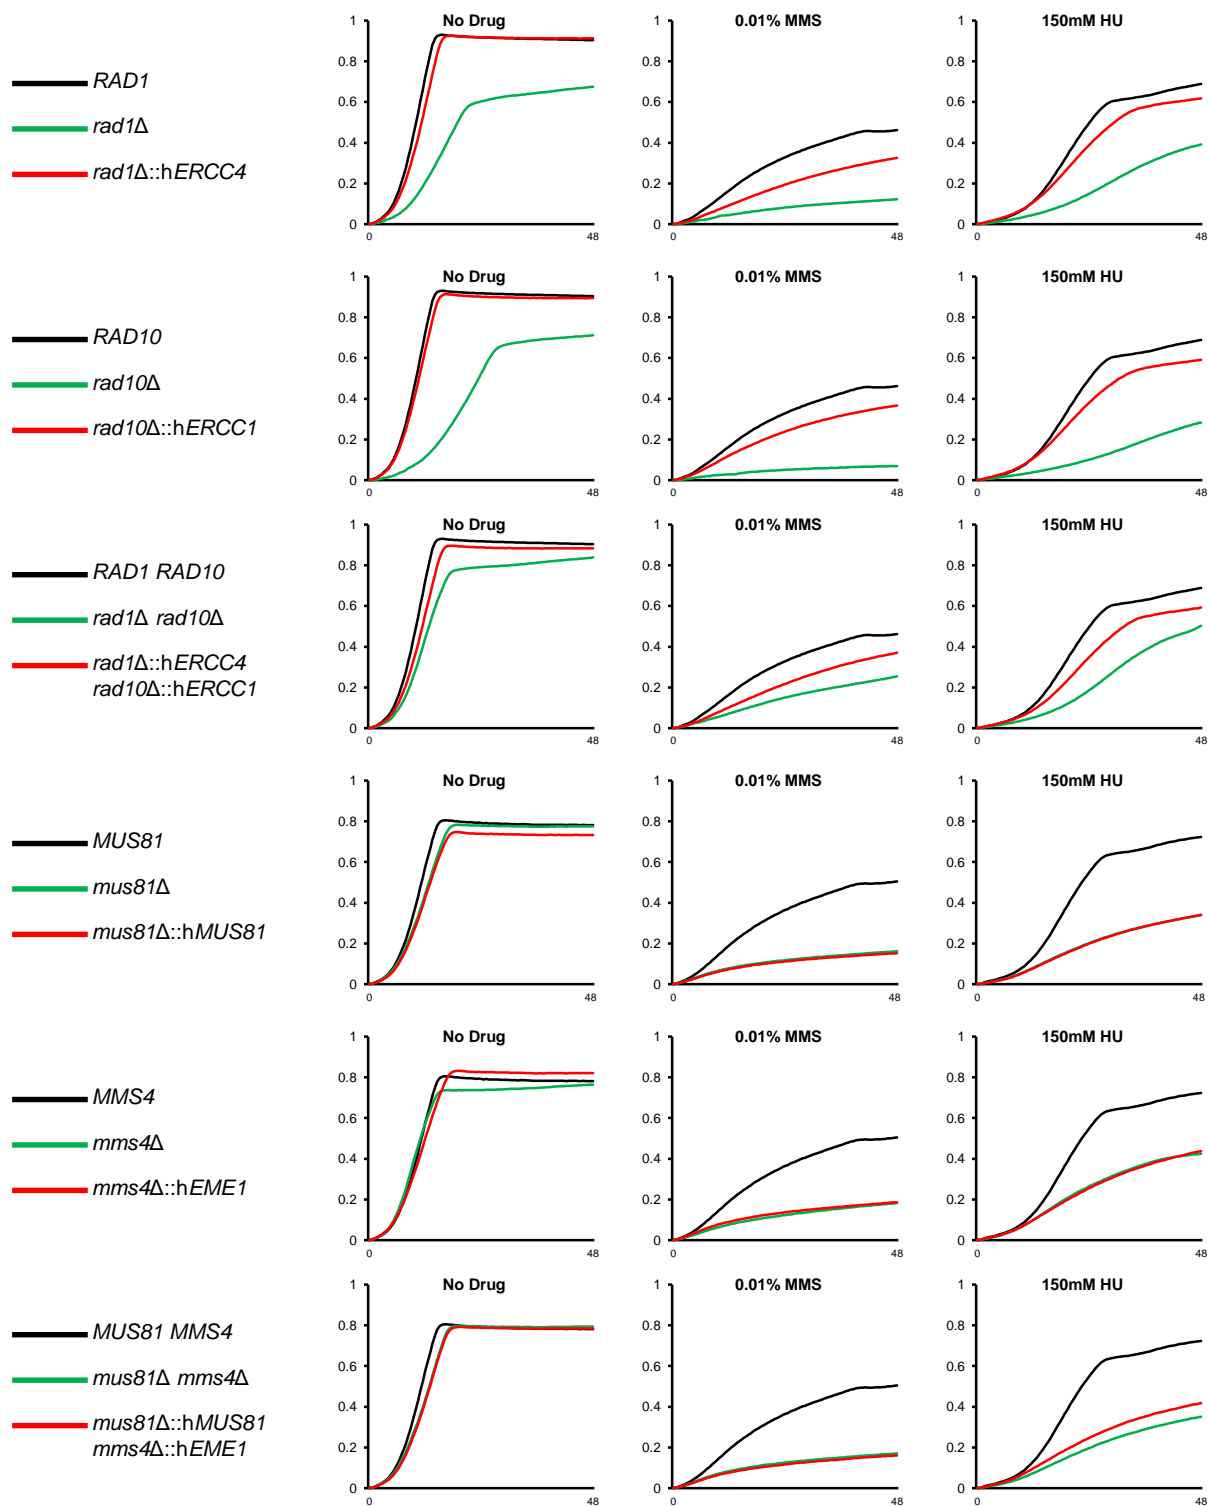

**Figure S2. Growth curve assays to assess complementation of two-subunit yeast complexes.**

Human cDNAs were integrated using CRISPR/Cas9 in the genomic location of the corresponding yeast gene. Yeast strains were grown in media +/- chemical at the indicated concentrations and each represented curve is the average of 3 replicates per media condition. For each panel, x-axis represents time in hours, while y-axis represents OD600 readings. Quantification of strain fitness is shown in Figure 2.
